# Supplementary material for: Waste eggshell membrane-templated synthesis of functional Cu2+–Cu+/biochar for an ultrasensitive electrochemical enzyme-free glucose sensor
Source: Royal Society of Chemistry journal article supplement (doi:10.1039/d1ra00303h), 2021-01-01
Supplement: d1ra00303h1.pdf [file d1ra00303h1.pdf]

## Supporting Information

### Waste eggshell membrane-templated synthesis of functional Cu<sup>2+</sup>- Cu<sup>+</sup>/biochar for ultrasensitive electrochemical enzyme-free glucose sensor

Linzhi Li<sup>a#</sup>, Tianzeng Huang<sup>b#</sup>, Saijun He<sup>a</sup>, Xing Liu<sup>a</sup>, Qi Chen<sup>a</sup>, Jian Chen<sup>a,c</sup>,  
Hongmei Cao<sup>a,c</sup>□

<sup>a</sup>College of Food Science and Technology, Hainan University, 58 Renmin Avenue, Haikou 570228, China;

<sup>b</sup>College of Chemistry and Engineering Technology, Hainan University, 58 Renmin Avenue, Haikou 570228, China;

<sup>c</sup>Key Laboratory of Food Nutrition and Functional Food of Hainan Province, 58 Renmin Avenue, Haikou 570228, China.

---

□Corresponding author.

E-mail addresses: hmcao@hainanu.edu.cn (Hongmei Cao)

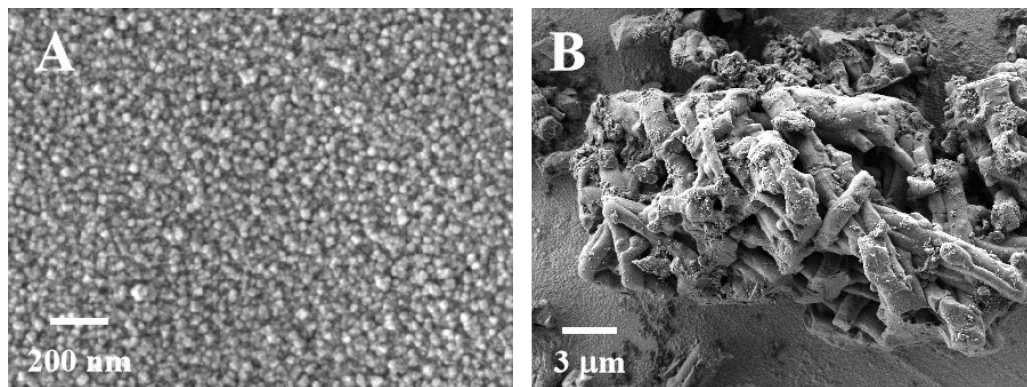

Fig.S1 The SEM images of the electrode after Au deposition(A) and Au/Cu<sup>2+</sup>-Cu<sup>+</sup>/biochar modified electrode (B).

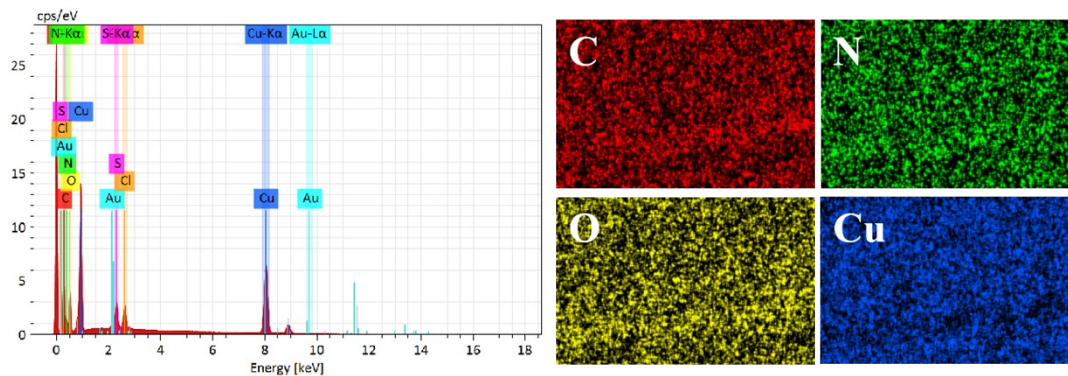

Fig.S2 EDS and EDS mapping of Au/Cu<sup>2+</sup>-Cu<sup>+</sup>/biochar.

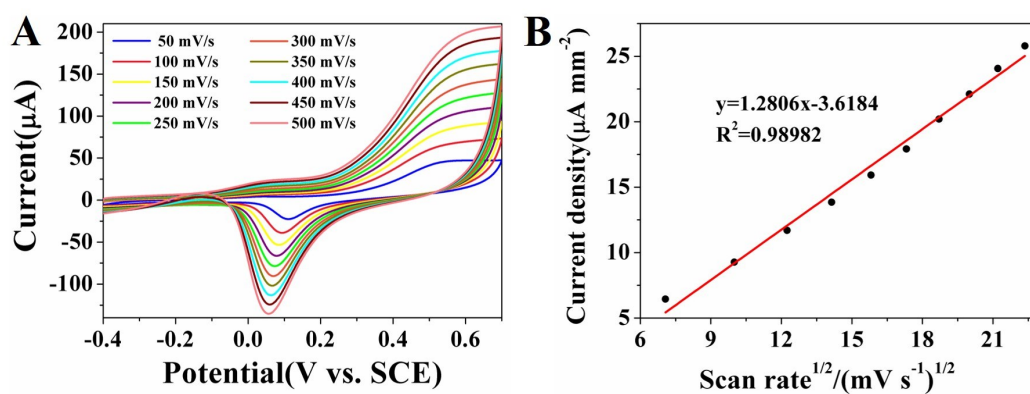

Fig. S3 (A) CV curves of Cu<sup>2+</sup>-Cu<sup>+</sup>/biochar/Au/GCE at different scan rates (50-500 mV s<sup>-1</sup>) for 5 mM glucose in 0.1 M NaOH; (B) A linear relationship between the square root of the scan rate and the current density.

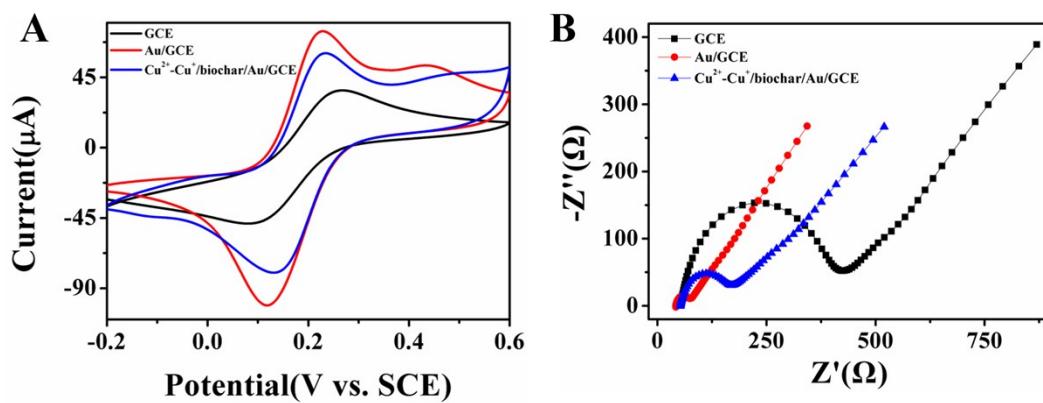

Fig. S4 (A) CV curves of bare GCE, Au/GCE and Cu<sup>2+</sup>-Cu<sup>+</sup>/biochar/Au/GCE in 5 mM [Fe(CN)<sub>6</sub>]<sup>3-</sup> and 0.1 M KCl containing 0.1 M NaOH solution; (B) Nyquist plots of EIS of bare GCE, Au/GCE and Cu<sup>2+</sup>-Cu<sup>+</sup>/biochar/Au/GCE in 10 mM [Fe(CN)<sub>6</sub>]<sup>3-/4-</sup> (1:1) and 0.1 M KCl containing 0.1 M NaOH solution.
